# Supplementary material
Source: PubMed Central journal article supplement (PMC6832071)
Supplement: JB.00383-19-s0006.pdf [file JB.00383-19-s0006.pdf]

## **Supplementary Information**

Supplementary Movie Legends

Supplementary Figures S1-S5

Supplementary Tables

Supplementary References

## Supplementary Movie Legends

**Movie S1.** Swarming assays in which *P. aeruginosa* is spotted (A) without phage or (B) with phage. (C) Pairwise swarming assay in which *P. aeruginosa* is spotted (left) without phage or (right) with phage. Time-lapse images are acquired over the course of 23 hours at 37 °C

**Movie S2.** Six-way swarming assays in which *P. aeruginosa* is spotted at the center. The same strain is spotted (A) without phage or (B) with phage at the satellite positions. Time-lapse images are acquired over the course of 17 hours at 37 °C.

**Movie S3.** Swarming assays of *P. aeruginosa* in the center and (A) rhamnolipids, (B) PQS, and (C) HHQ at the satellite positions for concentrations indicated in millimolar units. Time-lapse images are acquired over the course of 17 hours at 37 °C.

**Movie S4.** Swarming assays of uninfected wild-type *P. aeruginosa* in the center. The  $\Delta rhlAB$  strain is spotted (A) without phage or (B) with phage at the satellite positions. The  $\Delta rhlAB \Delta pqsA$  strain is spotted (C) without phage or (D) with phage at the satellite positions. Time-lapse images are acquired over the course of 17 hours at 37 °C.

**Movie S5.** Swarming assays of wild-type *P. aeruginosa* in the center and the (A) wild-type, (B)  $\Delta rhlAB$ , or (C)  $\Delta rhlAB \Delta pqsA$  strain mixed with gentamycin and spotted at satellite positions. Time-lapse images are acquired over the course of 18 hours at 37 °C.

**Figure S1**

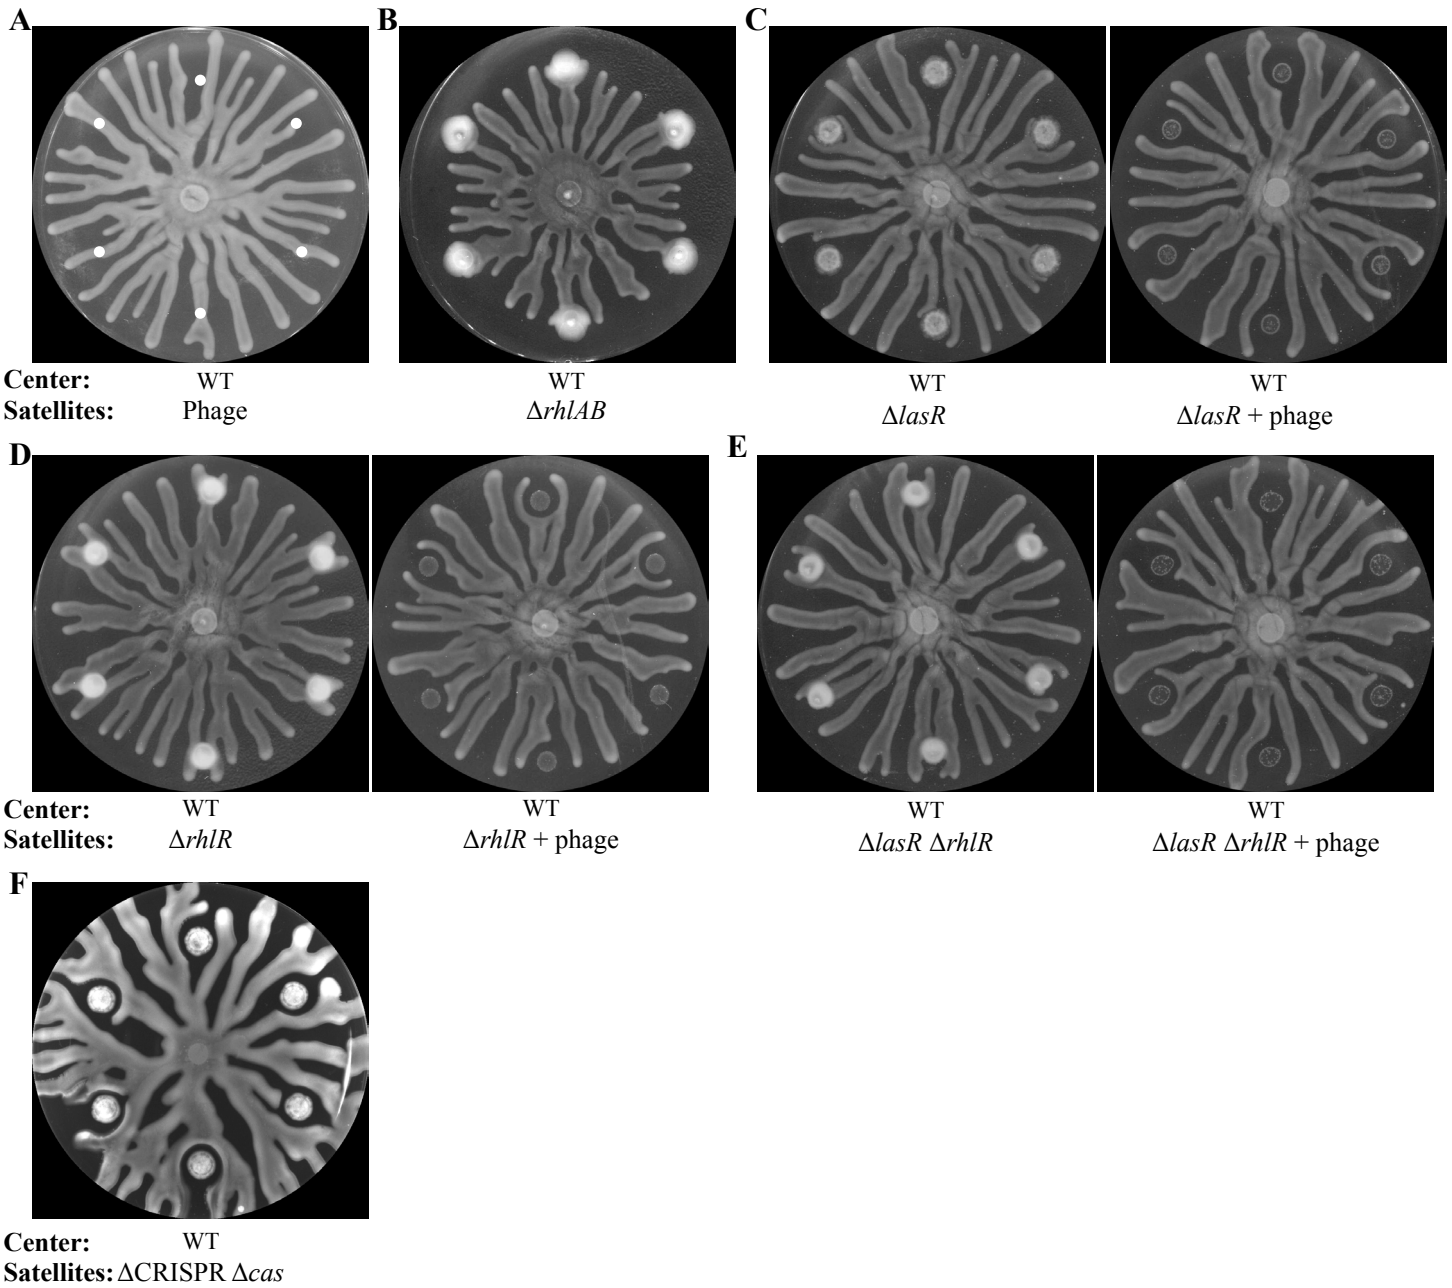

**Figure S1.** Swarming of wild-type *P. aeruginosa* at the center and (A) phage only at satellite positions, imaged after 16 hours of growth or (B) the  $\Delta rhLAB$  strain at the satellite positions, imaged after 14 hours of growth. The experiment in (B) is identical to that in Fig. 3B except that image was acquired at an earlier time point. Swarming assays of wild-type *P. aeruginosa* at the center and (C)  $\Delta lasR$ , (D)  $\Delta rhIR$ , and (E)  $\Delta lasR \Delta rhIR$  spotted at the satellite positions (left images) without phage or (right images) with phage. (F) Swarming assays of wild-type *P. aeruginosa* at the center and  $\Delta CRISPR \Delta cas$  at the satellite positions.

## Figure S2

A

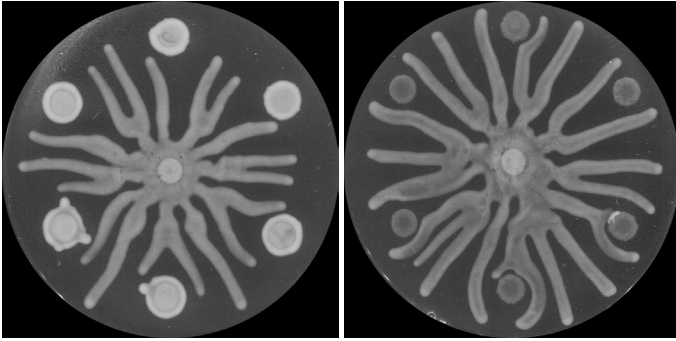

Center: WT  
Satellites:  $\Delta pqsA$

Center: WT  
Satellites:  $\Delta pqsA$  + phage

B

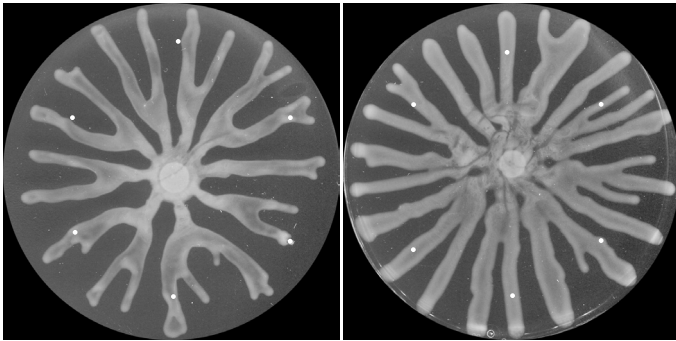

Center: WT  
Satellites:  $\Delta rhlAB$  filtered sup.

Center: WT  
Satellites:  $\Delta rhlAB$  sonicated  
& filtered sup.

**Figure S2.** (A) Swarming assay of wild-type *P. aeruginosa* at the center and the  $\Delta pqsA$  strain (left) without phage or (right) with phage. (B) Swarming assay of wild-type *P. aeruginosa* at the center and (left) filtered overnight culture or (right) sonicated and filtered overnight culture at the satellite positions. White dots at the satellite positions indicate the precise centers of positions where the cultures were spotted.

## Figure S3

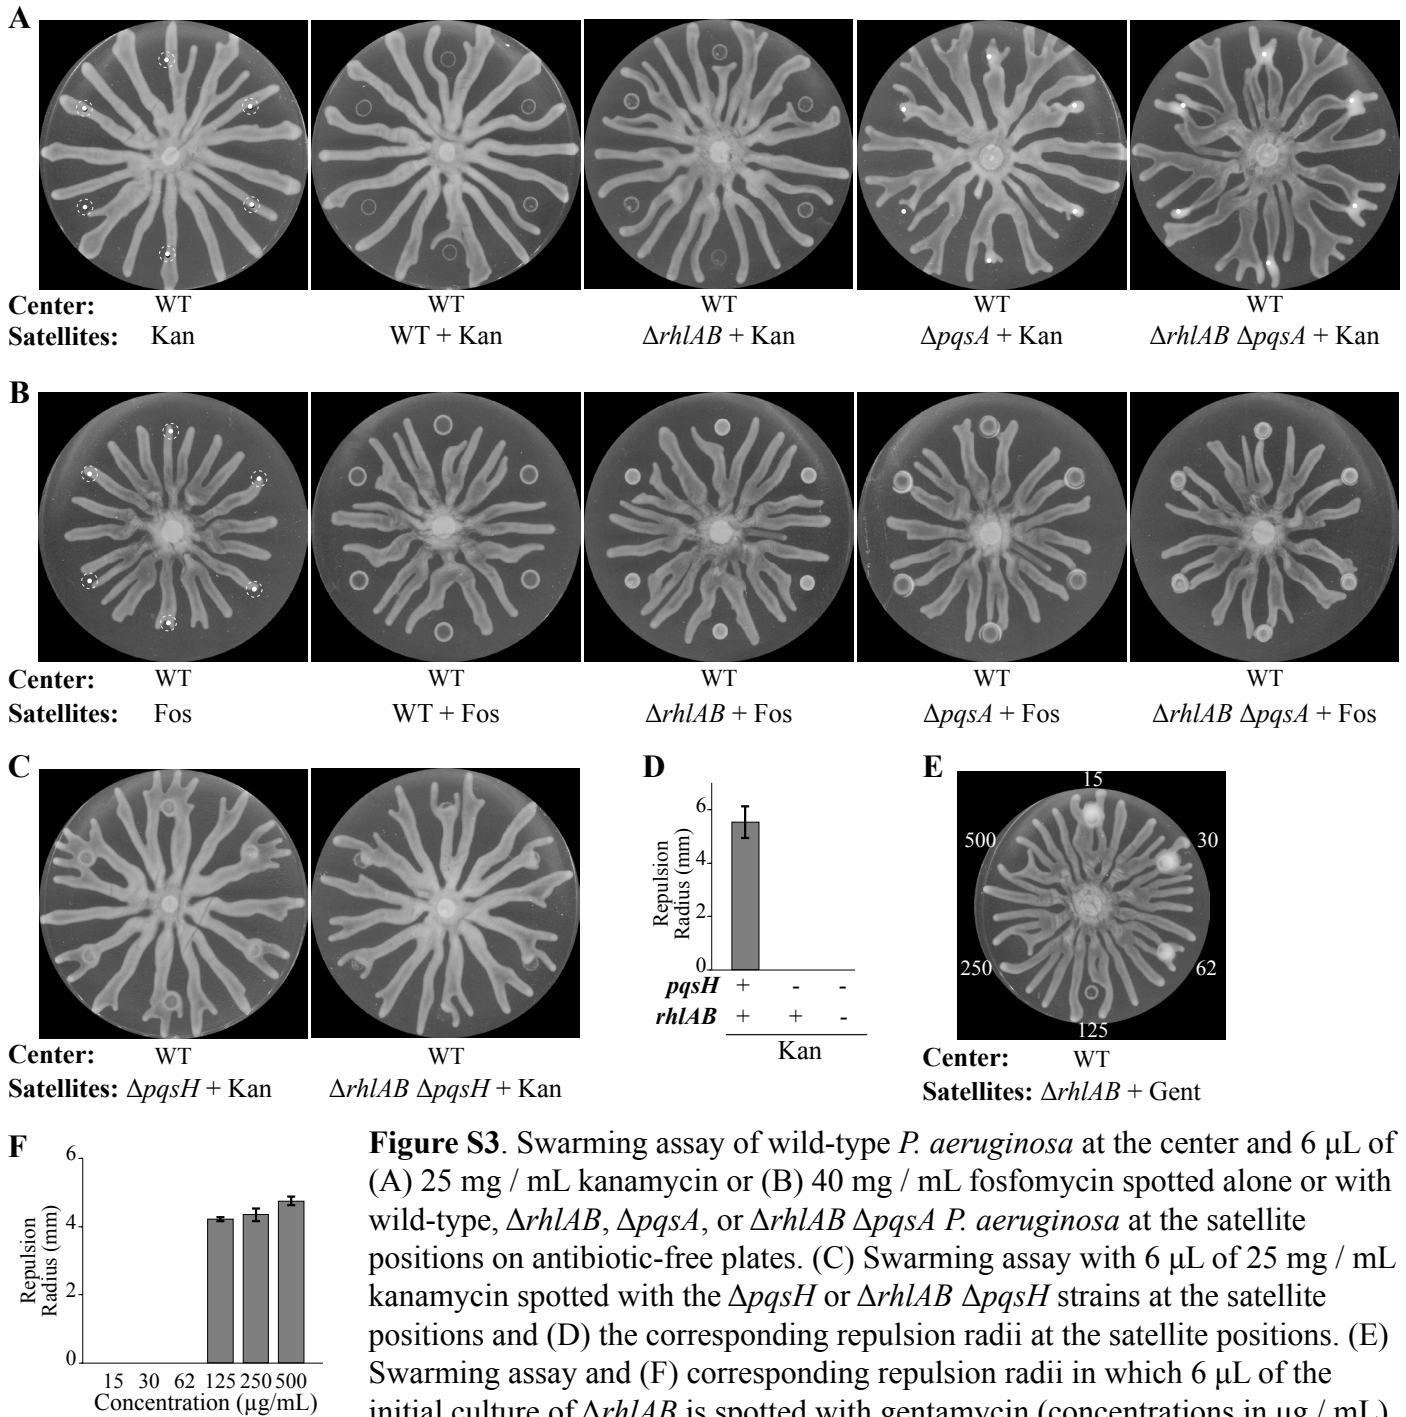

**Figure S3.** Swarming assay of wild-type *P. aeruginosa* at the center and 6  $\mu\text{L}$  of (A) 25 mg / mL kanamycin or (B) 40 mg / mL fosfomycin spotted alone or with wild-type,  $\Delta rhlAB$ ,  $\Delta pqsA$ , or  $\Delta rhlAB \Delta pqsA$  *P. aeruginosa* at the satellite positions on antibiotic-free plates. (C) Swarming assay with 6  $\mu\text{L}$  of 25 mg / mL kanamycin spotted with the  $\Delta pqsH$  or  $\Delta rhlAB \Delta pqsH$  strains at the satellite positions and (D) the corresponding repulsion radii at the satellite positions. (E) Swarming assay and (F) corresponding repulsion radii in which 6  $\mu\text{L}$  of the initial culture of  $\Delta rhlAB$  is spotted with gentamycin (concentrations in  $\mu\text{g} / \text{mL}$ ) at the satellite positions. White dots on the satellite positions indicate the precise centers of positions where the cultures or antibiotics were spotted. The dashed lines indicate the boundaries of the initial spots. Bars are the average of at least 6 positions and error bars indicate standard deviation.

## Figure S4

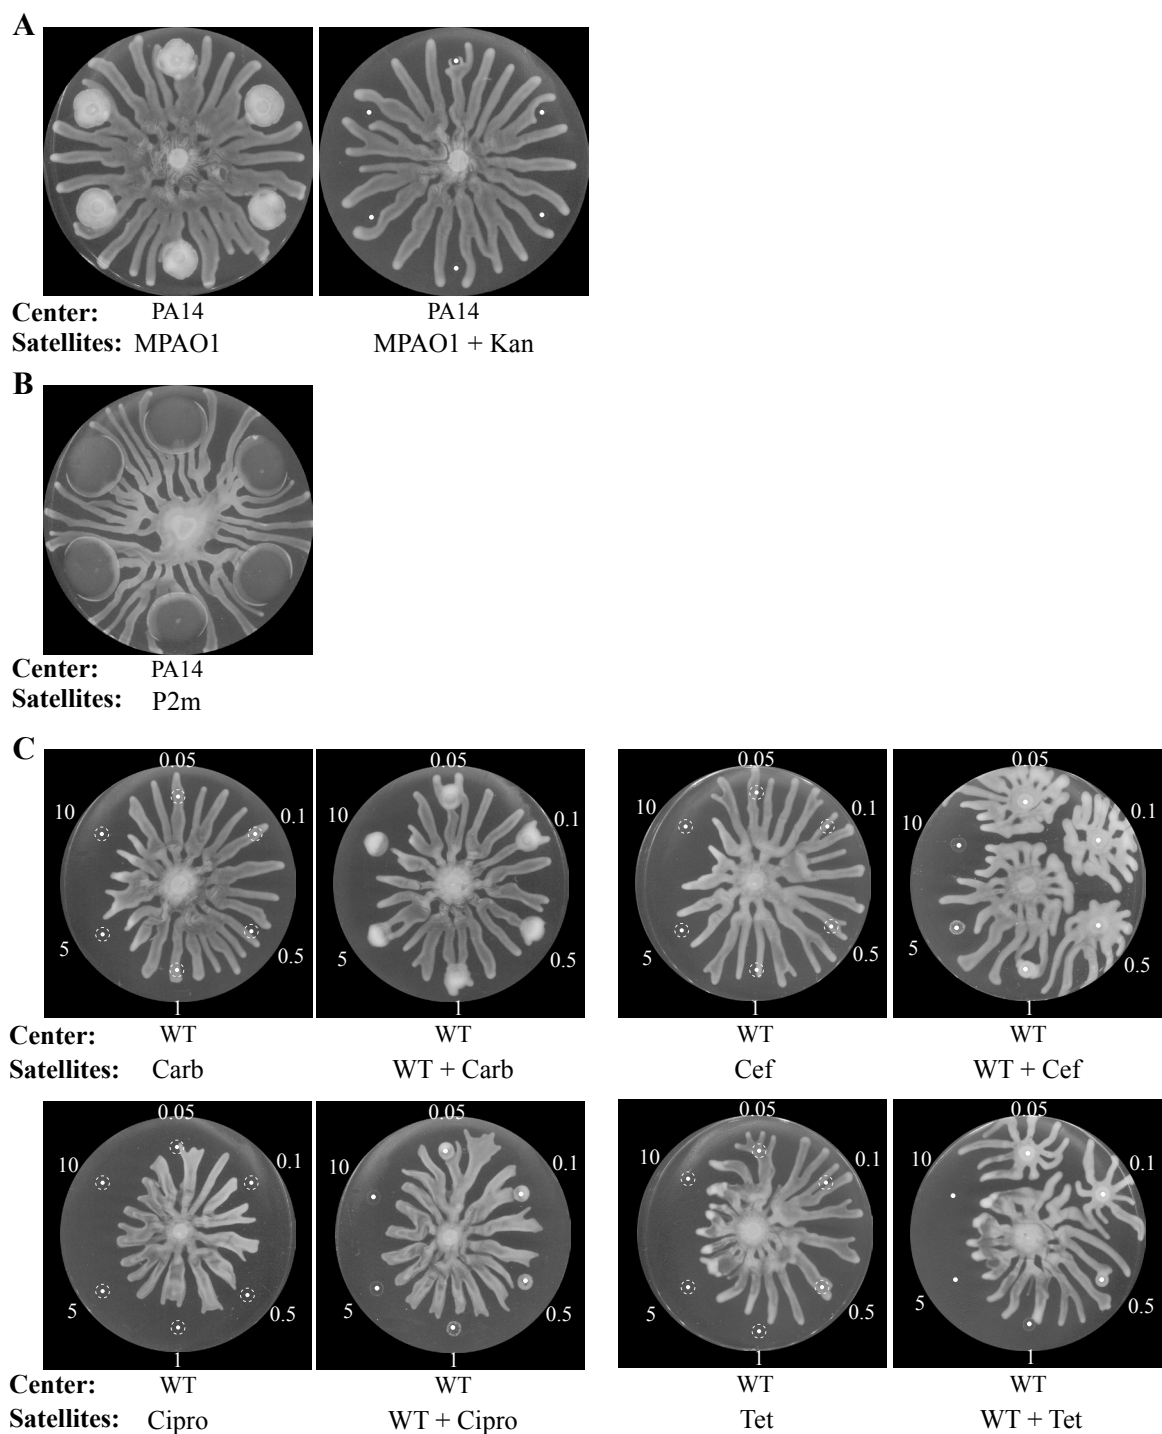

**Figure S4.** Swarming assay of wild-type *P. aeruginosa* PA14 at the center and 6  $\mu$ L at the satellite positions on antibiotic-free plates of (A) *P. aeruginosa* MPAO1 alone or with 25 mg / mL of kanamycin or (B) *P. aeruginosa* P2m. (C) Swarming assay with carbenicillin, cefsulodin, ciprofloxacin, or tetracycline (concentrations in mg / mL) spotted alone or with wild-type *P. aeruginosa* PA14 at the satellite positions on antibiotic-free plates. White dots at the satellite positions indicate the precise centers of positions where the cultures or antibiotics were spotted. The dashed lines indicate the boundaries of the initial spots.

**Figure S5**

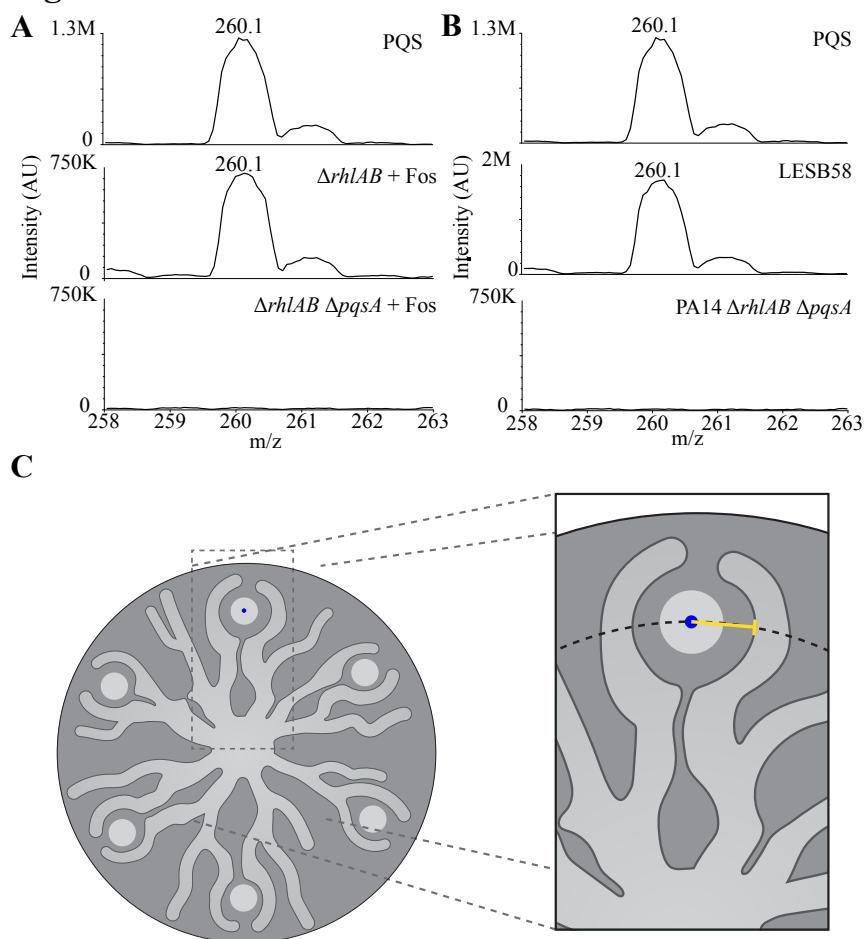

**Figure S5.** (A) LC-MS analysis of agar extracts for PA14  $\Delta rhlAB$  or PA14  $\Delta rhlAB \Delta pqsA$  in which cultures are mixed with 40 mg / mL of fosfomycin. 6  $\mu$ L of the mixture is spotted onto antibiotic-free swarming medium, incubated for 16-18 hours, and the area surrounding the colony is extracted. Pure 10  $\mu$ M PQS, which is not spotted onto agar, is provided as a reference. (B) LC-MS analysis of agar extracts surrounding the LESB58 or PA14  $\Delta rhlAB \Delta pqsA$  strains. (C) Schematic indicating the arc (dashed line) along which the radius of repulsion is measured (yellow). The blue dot indicates the center of the satellite colony.

## Supplementary Tables

### Table S1. Strains and plasmids

| Strain or plasmid name | Lab strain name | Genotype                                                                        | Reference / source  |
|------------------------|-----------------|---------------------------------------------------------------------------------|---------------------|
| <b>Strains</b>         |                 |                                                                                 |                     |
| WT                     | AFS27E.1        | PA14 <i>attTn7</i> ::[P <sub>A1/04/03</sub> -mCherry] <i>aacCI</i> ::FRT        | This study          |
| ΔCRISPR Δ <i>cas</i>   | NMHK326         | PA14 ΔCRISPR Δ <i>cas</i>                                                       | (1)                 |
| AFS27E                 | AFS27E          | PA14 <i>attTn7</i> ::[P <sub>A1/04/03</sub> -mCherry] <i>aacCI</i> <sup>+</sup> | (2)                 |
| Δ <i>lasR</i>          | AFS20.1         | PA14 Δ( <i>lasR</i> )::FRT                                                      | (3)                 |
| <i>rhlR</i>            | SM32            | PA14 Δ <i>rhlR</i>                                                              | (4)                 |
| Δ <i>lasR rhlR</i>     | AFS49H          | PA14 Δ( <i>lasR</i> )::FRT <i>rhlR</i> ::MAR2xT7                                | (3)                 |
| Δ <i>rhlAB</i>         | BR04.1          | PA14 Δ( <i>rhlAB</i> )::FRT                                                     | This study          |
| Δ <i>pqsA</i>          | AFS79.1         | AFS27E.1 Δ( <i>pqsA</i> )::FRT                                                  | This study          |
| Δ <i>rhlAB ΔpqsA</i>   | AFS82.1         | PA14 Δ( <i>rhlAB</i> )::FRT Δ( <i>pqsA</i> )::FRT                               | This study          |
| <i>pqsH</i>            | AFS77           | AFS27E.1 <i>pqsH</i> ::Mar2xT7                                                  | This study          |
| Δ <i>rhlAB pqsH</i>    | BR07            | PA14 Δ( <i>rhlAB</i> )::FRT <i>pqsH</i> ::Mar2xT7                               | This study          |
| LESB58                 |                 | Hyper-virulent <i>P. aeruginosa</i> clinical isolate                            | (5)                 |
| P2m                    |                 | Mucoid <i>P. aeruginosa</i> cystic fibrosis isolate<br>PAmFLR02                 | (6)                 |
| MPAO1                  |                 | <i>P. aeruginosa</i> strain MPAO1                                               | (7), from Gitai lab |
| <b>Plasmids</b>        |                 |                                                                                 |                     |
| pFLP2                  |                 | Plasmid expressing Flp to recombine FRT sites                                   | (8)                 |
| pAS03                  |                 | Plasmid containing FRT- <i>aacCI</i> -FRT template                              | (9)                 |
| pUCP18-RedS            |                 | λ Red recombineering vector                                                     | (10)                |
| <b>Phage</b>           |                 |                                                                                 |                     |
| DMS3vir                | DMS3vir         |                                                                                 | (11)                |

### Table S2. Primers

| Primer name               | Sequence                                                     |
|---------------------------|--------------------------------------------------------------|
| <b>Lambda red primers</b> |                                                              |
| rhlA-lred-u1              | CCCTCGAGTTCTCCAATACC                                         |
| rhlA-lred-l1              | CATCTCACACCTCCCAAAAATTTTC                                    |
| rhlA-lred-u2              | GCTGTTTGCTGTTTCGAAAATTTTGGGAGGTGTGAGATGattccgggatccgtcgacc   |
| rhlB-lred-l2              | TCTGTTATGCCAGCACCGTTTCAGGACGCAGCCTTCAGCCAAtgtagctggagctgctcg |
| rhlB-lred-u3              | TGGCTGAAGGCTGCGTCTCTGA                                       |
| rhlB-lred-l3              | TCGAAGCTGGAGATGTTCTG                                         |
| pqsA-lred-u1              | CGACCGGCGATTCCATTTTC                                         |
| pqsA-lred-l1              | CATGACAGAACGTTCCCTCT                                         |
| pqsA-lred-u2              | ATCCGGATGCATATCGCTGAAGAGGGAACGTTCTGTCATGattccgggatccgtcgacc  |
| pqsA-lred-l2              | TTCACCCACACGCTGAATCAACATGCCCGTTCCCTCCGGttagctggagctgctcg     |
| pqsA-lred-u3              | CCGGAGGAACGGGCATGTTG                                         |
| pqsA-lred-l3              | GTTGAGGTGTCCCTTGACGT                                         |
| pqsH-u1                   | CCTGGATGATCGTCTGTTGGC                                        |
| pqsH-l1                   | CCAACCTCTCGAGGTCGTTGT                                        |
| <b>qPCR primers</b>       |                                                              |
| pqsA qPCR u2              | AGGCGGTTCTGGTTCCTAC                                          |
| pqsA qPCR l2              | GCATGTGCGAGGGAATCTG                                          |
| pqsB qPCR u1              | CTCTACGTGGTTCGATACCCCTCG                                     |
| pqsB qPCR l1              | CAGACTCGCTGTCCACTTCCAA                                       |
| pqsH qPCR u1              | TTCCAGTCTGGGTGGGAGTTC                                        |
| pqsH qPCR l1              | TCGAGGATCTGCACGATGGAG                                        |
| rhlA qPCR u1              | GCGCTTCGAGGTCAATCAC                                          |
| rhlA qPCR l1              | AGCATCGCTGGTTCAGTC                                           |
| rhlB qPCR u1              | CGGCGACGTATTTCCCTTCATC                                       |
| rhlB qPCR l1              | TAGGTCAGTTCGTGCTCAG                                          |
| 5S qPCR u1                | GAACCACCTGATCCCTTCCC                                         |
| 5S qPCR l1                | TAGGAGCTTGACGATGACCT                                         |



## Supplementary References

1. Høyland-Kroghsbo NM, Muñoz KA, Bassler BL. 2018. Temperature, by Controlling Growth Rate, Regulates CRISPR-Cas Activity in *Pseudomonas aeruginosa*. *mBio* 9.
2. Siryaporn A, Kim MK, Shen Y, Stone HA, Gitai Z. 2015. Colonization, competition, and dispersal of pathogens in fluid flow networks. *Curr Biol* 25:1201–1207.
3. O'Loughlin CT, Miller LC, Siryaporn A, Drescher K, Semmelhack MF, Bassler BL. 2013. A quorum-sensing inhibitor blocks *Pseudomonas aeruginosa* virulence and biofilm formation. *Proceedings of the National Academy of Sciences* 110:17981–17986.
4. Høyland-Kroghsbo NM, Paczkowski J, Mukherjee S, Broniewski J, Westra E, Bondy-Denomy J, Bassler BL. 2017. Quorum sensing controls the *Pseudomonas aeruginosa* CRISPR-Cas adaptive immune system. *Proceedings of the National Academy of Sciences* 114:131–135.
5. Cheng K, Smyth RL, Govan JR, Doherty C, Winstanley C, Denning N, Heaf DP, van Saene H, Hart CA. 1996. Spread of beta-lactam-resistant *Pseudomonas aeruginosa* in a cystic fibrosis clinic. *Lancet* 348:639–642.
6. Quinn RA, Phelan VV, Whiteson KL, Garg N, Bailey BA, Lim YW, Conrad DJ, Dorrestein PC, Rohwer FL. 2016. Microbial, host and xenobiotic diversity in the cystic fibrosis sputum metabolome. *ISME J* 10:1483–1498.
7. Jacobs MA, Alwood A, Thaipisuttikul I, Spencer D, Haugen E, Ernst S, Will O, Kaul R, Raymond C, Levy R, Chun-Rong L, Guenther D, Bovee D, Olson MV, Manoil C. 2003. Comprehensive transposon mutant library of *Pseudomonas aeruginosa*. *Proceedings of the National Academy of Sciences* 100:14339–14344.
8. Hoang TT, Karkhoff-Schweizer RR, Kutchma AJ, Schweizer HP. 1998. A broad-host-range Flp-FRT recombination system for site-specific excision of chromosomally-located DNA sequences: application for isolation of unmarked *Pseudomonas aeruginosa* mutants. *Gene* 212:77–86.
9. Shen Y, Siryaporn A, Lecuyer S, Gitai Z, Stone HA. 2012. Flow Directs Surface-Attached Bacteria to Twitch Upstream. *Biophysical Journal* 103:146–151.
10. Lesic B, Rahme LG. 2008. Use of the lambda Red recombinase system to rapidly generate mutants in *Pseudomonas aeruginosa*. *BMC Molecular Biology* 9:20.
11. Cady KC, Bondy-Denomy J, Heussler GE, Davidson AR, O'Toole GA. 2012. The CRISPR/Cas Adaptive Immune System of *Pseudomonas aeruginosa* Mediates Resistance to Naturally Occurring and Engineered Phages. *Journal of Bacteriology* 194:5728–5738.
